# Supplementary material
Source: MDPI journal article supplement (https://www.mdpi.com/2073-4468/12/4/68)

## Supplemental Material

**Supplementary Table S1:** Physicochemical testing of CEX fractions

| Sample Description | DAR by Reduced RP-LC | HMW by SEC, % | LMWs by nrCE-SDS, % | LMWs by rCE-SDS, % | DAR by RP-LCMS | LMWs by RP-LCMS | HMW (covalent bond) by RP-LCMS |
|--------------------|----------------------|---------------|---------------------|--------------------|----------------|-----------------|--------------------------------|
| Start material     | 2.20                 | 0.5           | 13.3                | 4.6                | 2.20           | Comparable      | Undetected                     |
| Main peak          | 2.16                 | 0.7           | 13.2                | 4.6                | 2.16           |                 |                                |
| Pre-peak 1         | 2.14                 | 1.8           | 14.4                | 5.7                | 2.14           |                 |                                |
| Pre-peak 2         | Not Tested           |               |                     |                    | comparable     | 6% ↑            |                                |

**Supplementary Table S2:** Physicochemical testing of N102, isoD102, and N102D Mutant. LOQ is defined as limit of quantification.

| Test                 |                    | N102 | isoD102 | N102D Mutant |
|----------------------|--------------------|------|---------|--------------|
| DAR                  |                    | 2.27 | 2.27    | 2.17         |
| HPSEC                | Monomer (%)        | 99.3 | 99.2    | 96.2         |
|                      | Aggregate (%)      | 0.7  | 0.6     | 3.6          |
|                      | Other/Fragment (%) | 0.0  | 0.2     | 0.2          |
| CE-SDS (non-reduced) | Purity (%)         | 86.0 | 86.7    | 87.3         |
|                      | Monomer (%)        | 86.0 | 86.7    | 87.3         |
|                      | Leading Peak (%)   | 4.2  | 3.9     | 4.6          |
|                      | Shoulder (%)       | 0.0  | 0.0     | 0.0          |
|                      | ½ Antibody (%)     | 8.0  | 7.5     | 6.1          |
|                      | Other (%)          | 1.9  | 1.8     | 1.9          |
| CE-SDS (reduced)     | Purity (%)         | 95.2 | 94.5    | 95.7         |
|                      | Heavy Chain (%)    | 66.3 | 65.6    | 66.1         |
|                      | Light Chain (%)    | 29.0 | 28.9    | 29.7         |
|                      | HCLP (%)           | 1.8  | 1.9     | 1.0          |
|                      | Fragment (%)       | <LOQ | <LOQ    | 0.0          |
|                      | Other (%)          | 2.9  | 3.5     | 3.3          |

**Supplementary Figure S1:** Highly similar MS/MS from synthetic peptides with D102, isoD102, and deamidated N102 in ADC-A tryptic digest.

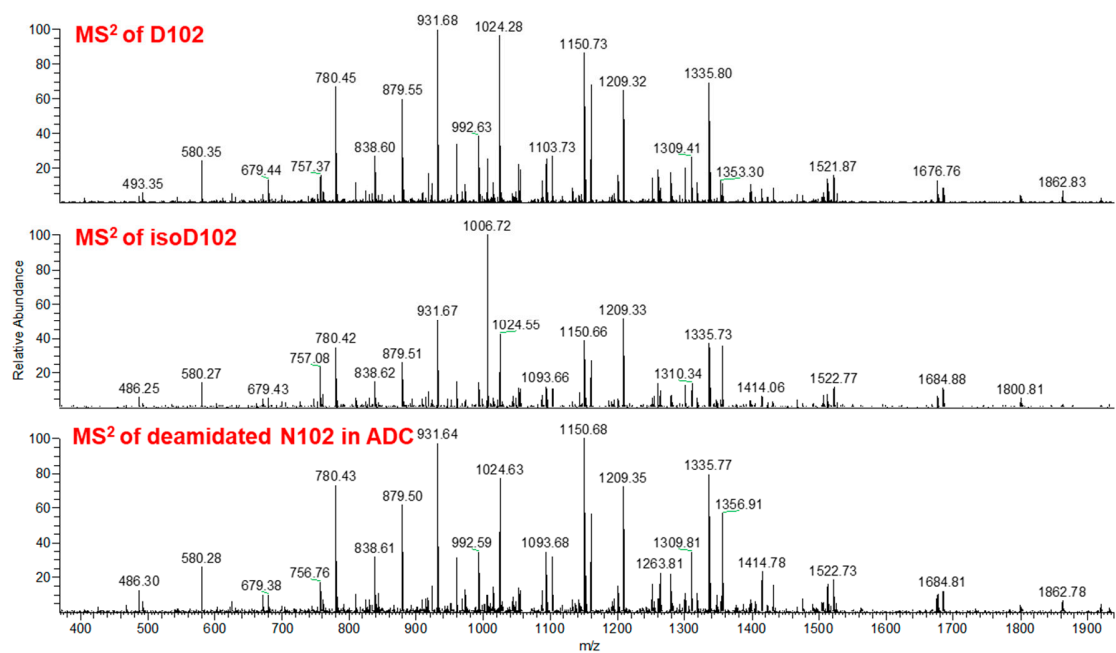

**Supplementary Figure S2:** NW deamidation pathway in ADC-A and its mAb intermediate. The red arrow designates the direction of the nucleophilic attack from the alpha-NH group on the carbonyl carbon of the side chain within the asparagine residue. The succinimide intermediate within ADC-A's NW deamidation pathway solely converts to iso-aspartic acid (illustrated with green check mark) and not aspartic acid (illustrated with red prohibition sign).

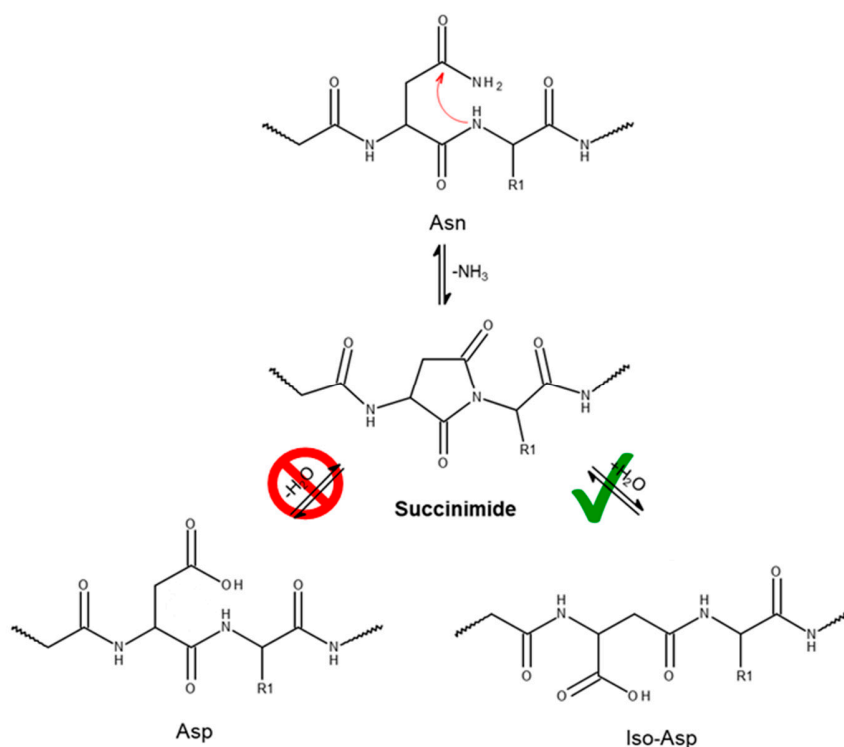

**Supplementary Figure S3:** CEX profiles of ADC D-form (D102 in both HC), isoD-form (isoD102 in one HC, N102 in another HC) and N-form (N102 in both HC)

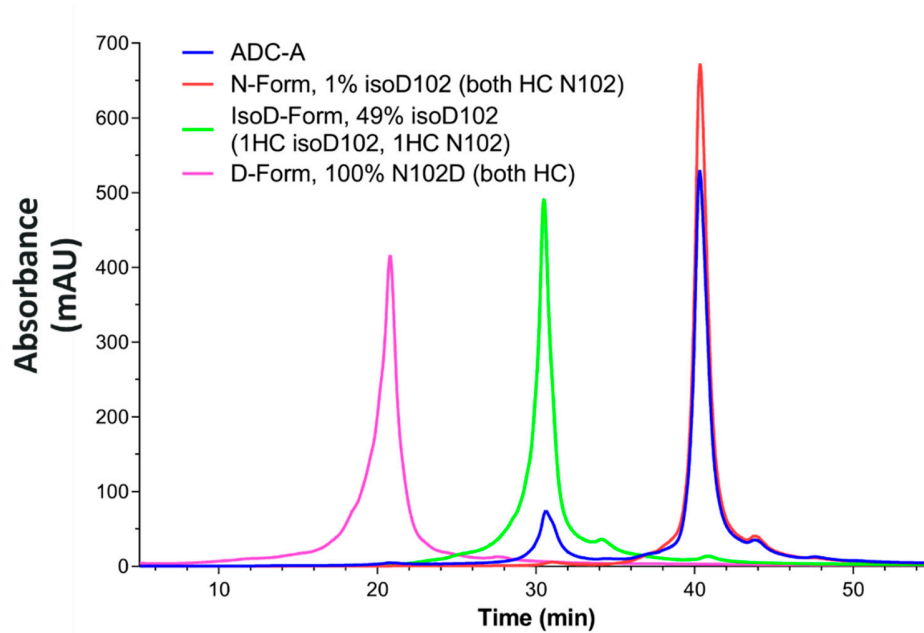

**Supplementary Figure S4:** Peptide mapping UV overlay of pH 9-stressed Recombinant Fab (top) and Fab that was generated via digestion from pH 9-stressed CEX Prepeak 1 (bottom), with native N102 peak and deamidated isoD102 peaks labeled.

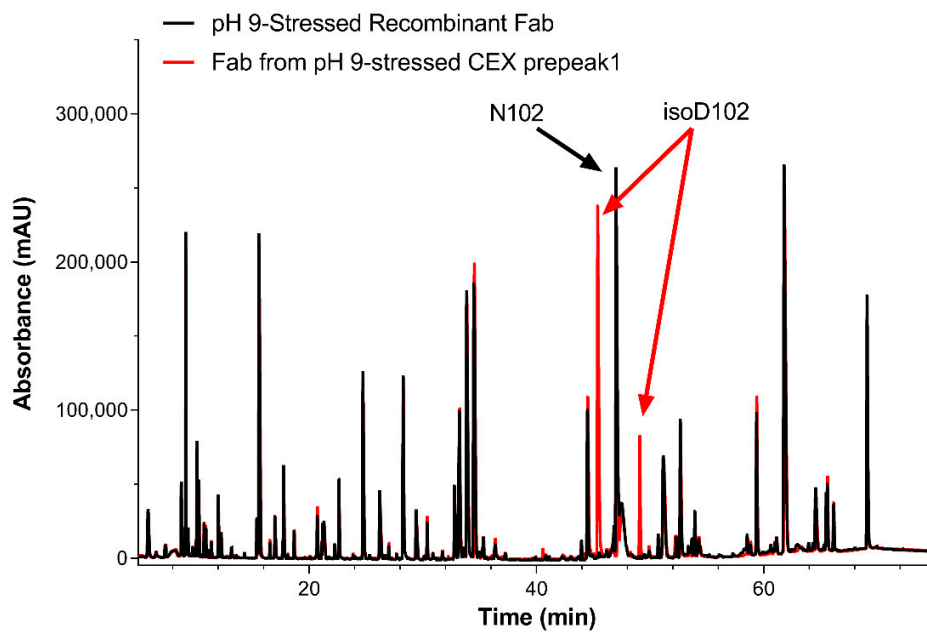

**Supplementary Figure S5:** Zoomed-in Peptide mapping UV overlay of pH 9-stressed Recombinant Fab (top) and Fab that was generated via digestion from pH 9-stressed CEX Prepeak 1 (bottom), with native N102 peak and deamidated isoD102 peaks labeled.

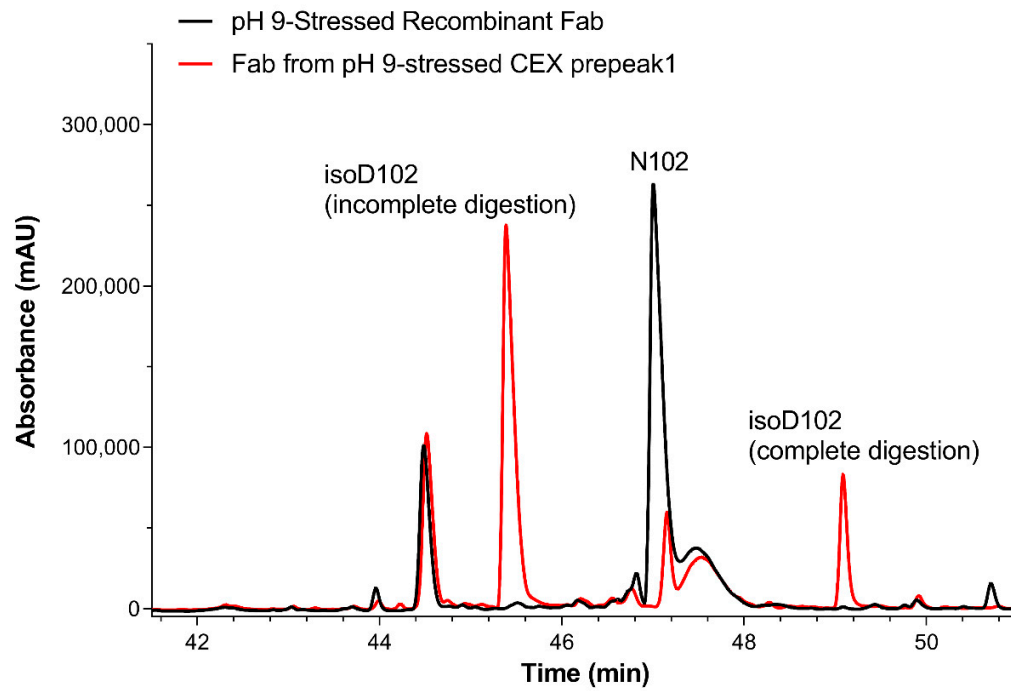

Supplement: s1 [file s1]
